# Supplementary material
Source: Springer Nature journal article supplement (https://cannabishub.eu/wp-content/uploads/2026/05/41419_2026_8744_MOESM1_ESM.pdf)
Supplement: MOESM1 [file 41419_2026_8744_MOESM1_ESM.pdf]

## SUPPLEMENTAL MATERIAL

This supplemental material contains 6 supplemental figures and relative legends

### SUPPLEMENTAL FIGURE LEGENDS

Figure S1. HT29 were treated twice at 48-hour intervals with DHA, EPA, PA and OA (10  $\mu$ M, 50  $\mu$ M and 100  $\mu$ M), or BSA as control (NTC); EdU was added to cells for the last 6 hours of treatment. Cells were fixed and stained after a total of 72 hours. Representative images are shown; EdU is in red, E-Cadherin in green, NucBlue™ in blue; scale bar 20  $\mu$ m.

Figure S2. A) Representative images of Liperfluo staining (in green) in HT29, after treatment with DHA 50 and 100  $\mu$ M (same schedule described in figure 2A); scale bar 50  $\mu$ m. B) Representative images of Bodipy® 581/591 C11 staining in HT29, after treatment with DHA 50 and 100  $\mu$ M (schedule described in figure 2C); reduced dye is in pink, oxidized dye is in green, scale bar 50  $\mu$ m. C) HT29 were treated twice at 48-hour interval with DHA (50  $\mu$ M), Erastin (5  $\mu$ M), Ferrostatin-1 (10  $\mu$ M) in combination with DHA or Erastin and BSA as negative control; lipid peroxidation was detected after a total of 72 hours using Liperfluo and analyzed by flow cytometry. Representative histograms are shown; the percentage of cells with fluorescence signal intensity above the threshold of 50, from 3 independent experiments, is plotted as mean $\pm$ SEM; \*\*p<0,01, \*\*\*p<0,001, \*\*\*\*p<0,0001 *versus* NTC; Erastin *versus* Erastin + Ferrostatin-1 ns; DHA 50  $\mu$ M *versus* DHA 50  $\mu$ M + Ferrostatin-1 \*\*p<0,01; DHA 100  $\mu$ M *versus* DHA 100  $\mu$ M + Ferrostatin-1 \*\*\*\*p<0,0001.

Figure S3. A) Negative control of Click-iT reaction (in green) in HT29; E-Cadherin in red, NucBlue™ in blue; scale bar 10  $\mu$ m. B) Representative pictures of single structural marker

GRP78 and Rab4 (red), DHA Alkyne and DAPI (green and blue), merge and phase sections are reported. Scale bar 5 mm.

Figure S4. A) All PDTOs were treated three times at 48-hour interval with DHA (10  $\mu$ M, 50  $\mu$ M and 100  $\mu$ M) or BSA as control; viability was measured as ATP content after a total of 7 days. For each PDTO, the percentage of viable cells in different conditions compared to the BSA-treated control (NTC) is plotted as mean $\pm$ SEM; \* $p$ <0,05, \*\* $p$ <0,01, \*\*\* $p$ <0,001, \*\*\*\* $p$ <0,0001 *versus* respective NTC. B) All PDTOs were grown for 3 days in complete medium; EdU was added to the medium for the last 6 hours before fixation and staining. The percentage of EdU-positive nuclei in each condition is plotted as mean $\pm$ SEM.

Figure S5. A) Representative pictures of CRC0124 stained with DHA alkyne (in green), Rab4, GRP78 and GM130 (in red), Ecadherin (in magenta) and NucBlue™ (in blue); scale bar 10  $\mu$ m.

Figure S6. Representative flow cytometry images showing the strategy that was implemented for the analysis of lipid peroxidation with Liperfluo in HT29 cells (A, experiments shown in figures 2 and S2) and PDTOs (B, experiments shown in figure 5).

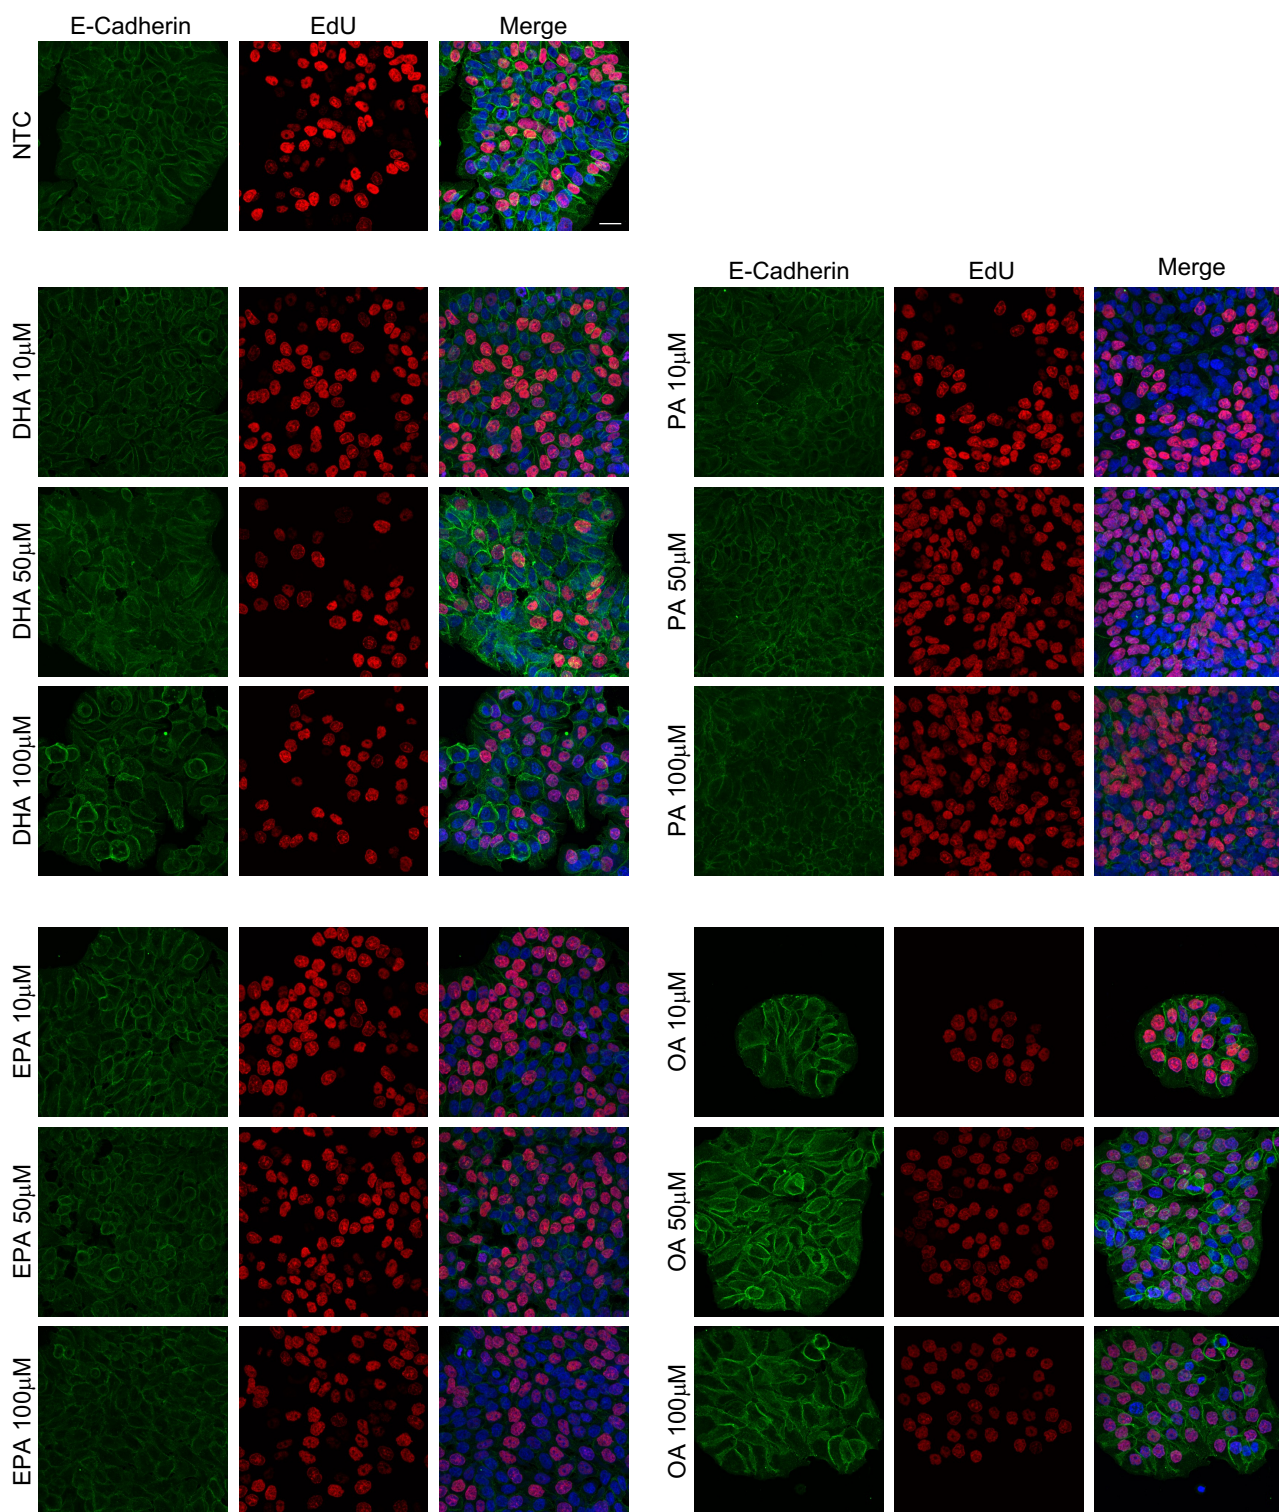

Figure S1

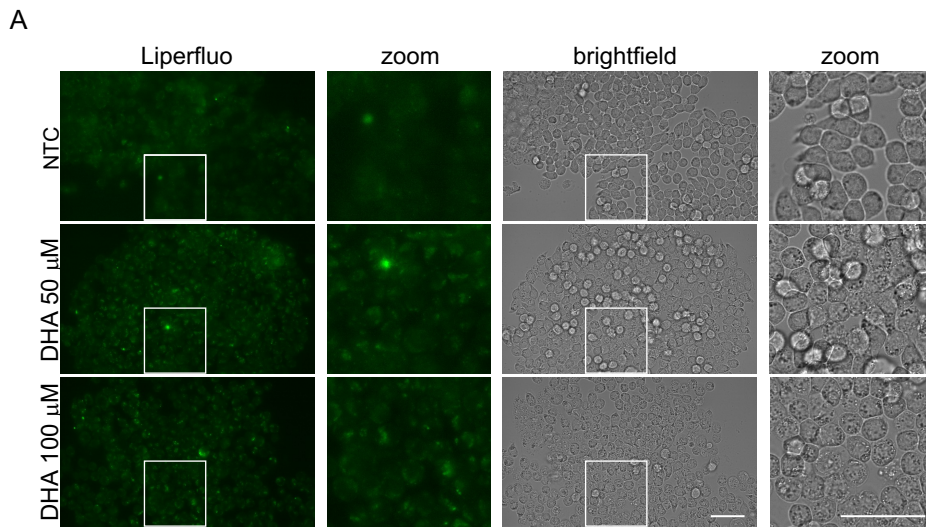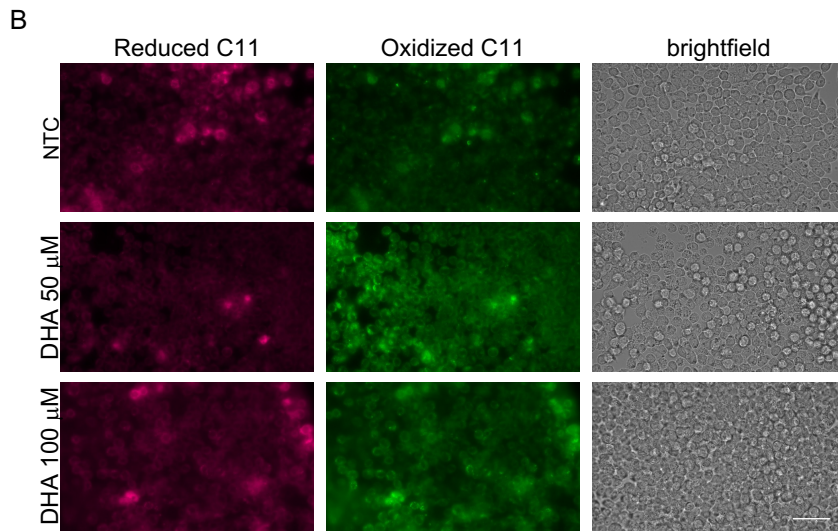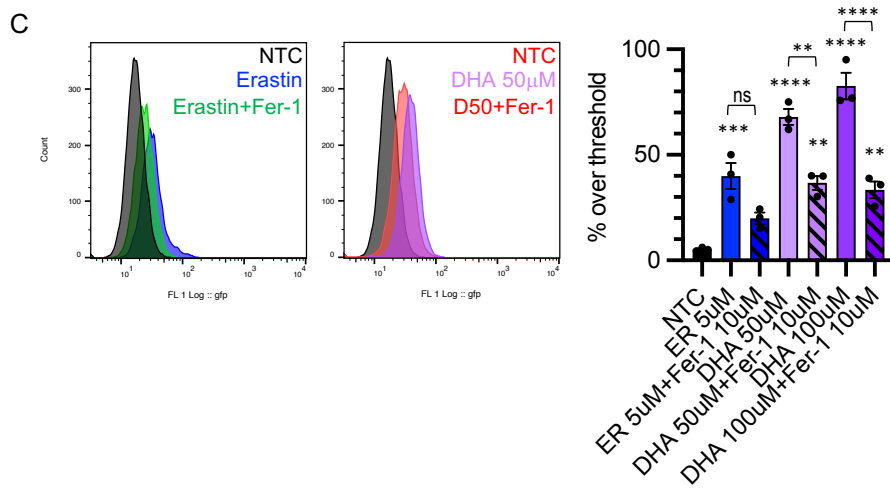

Figure S2

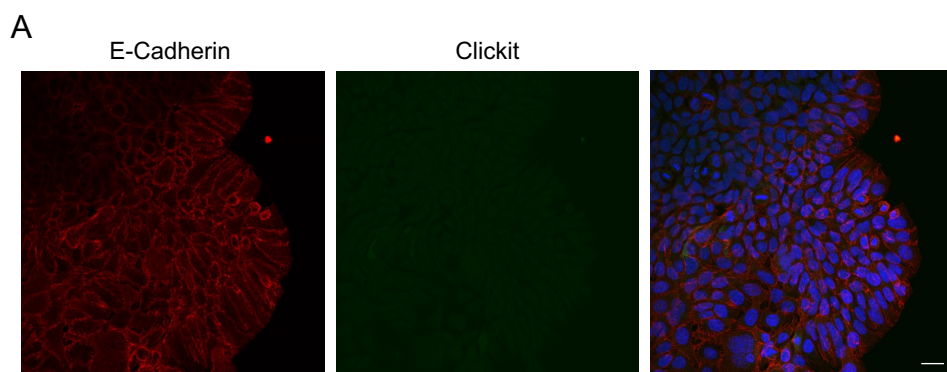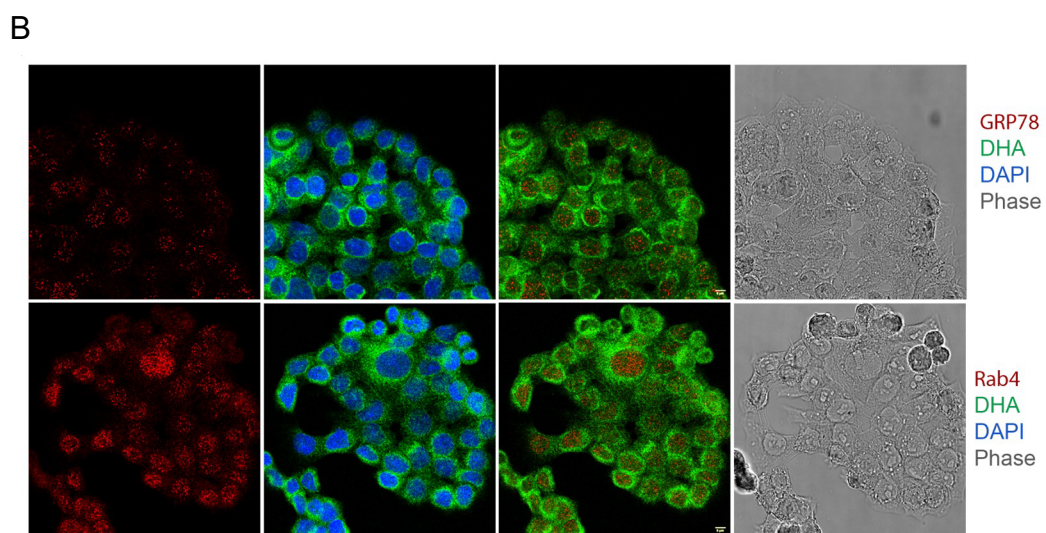

Figure S3

A

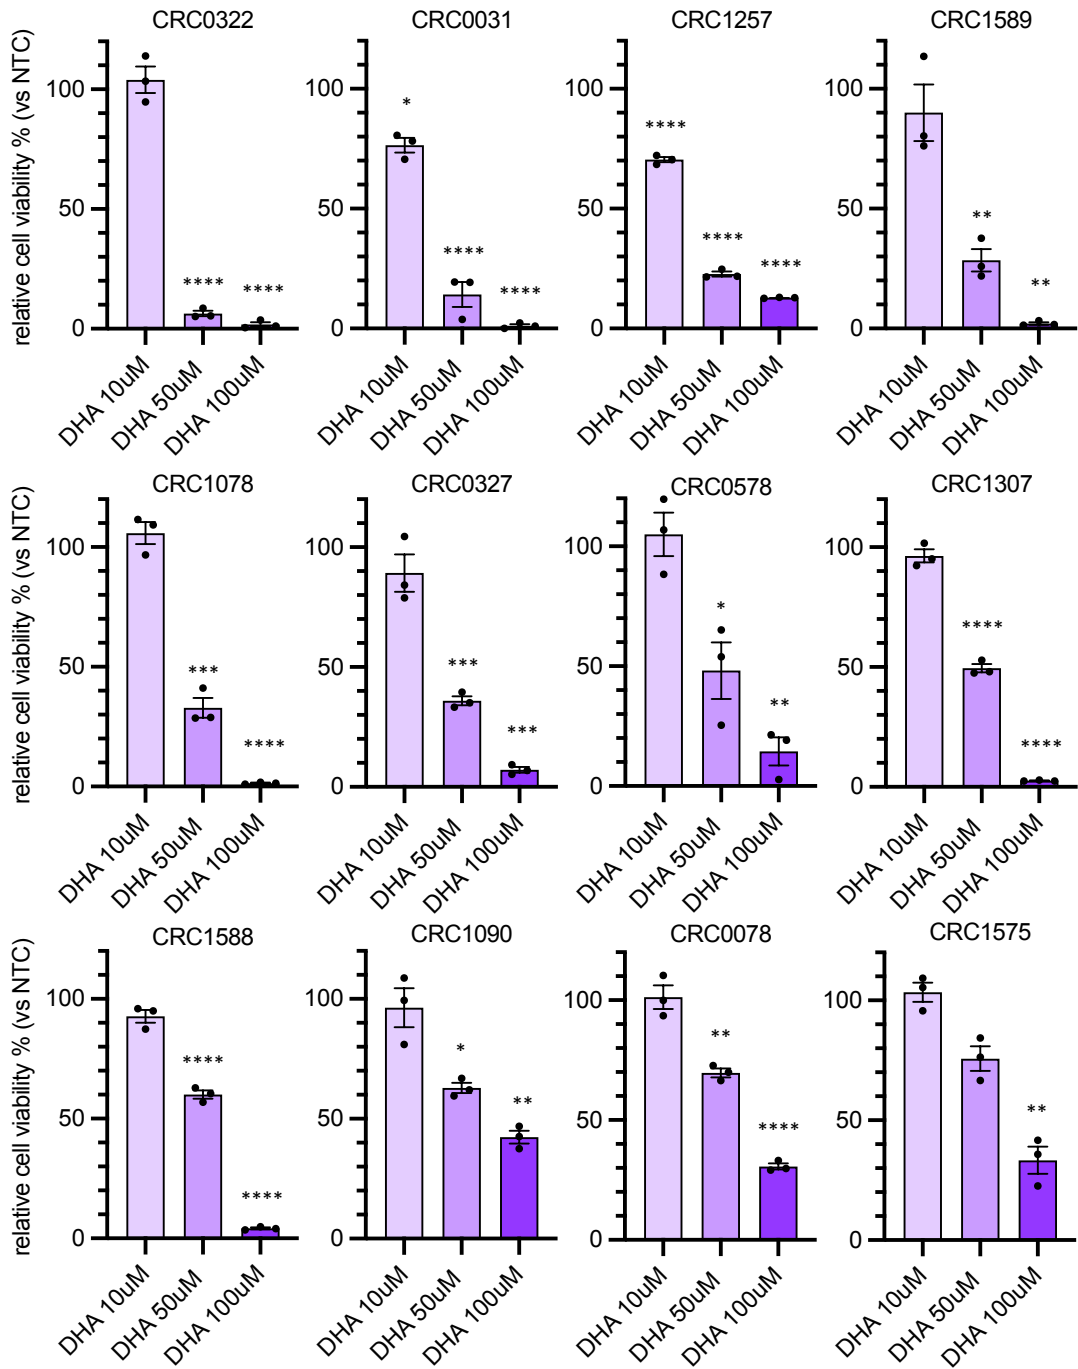

B

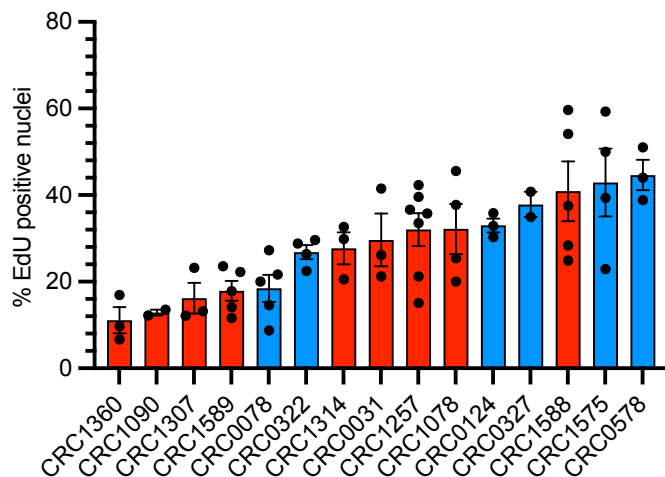

Figure S4

A

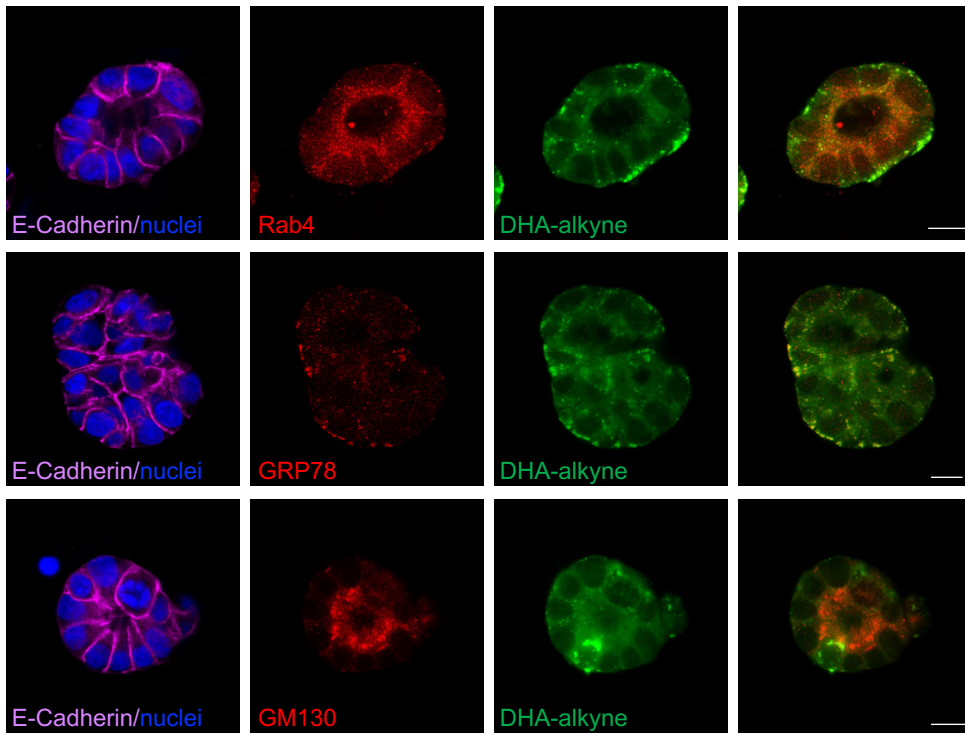

Figure S5

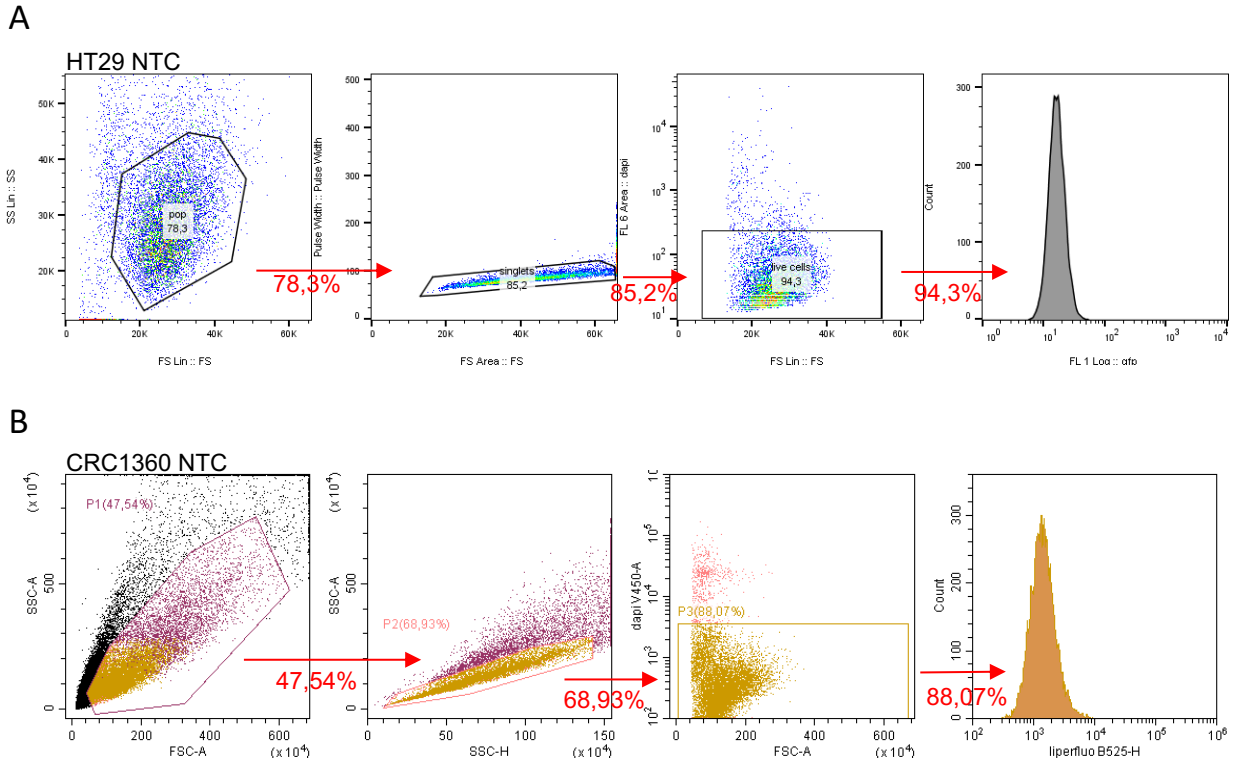

Figure S6
